# Supplementary material for: Label-free Tracking of Single Virus Entry
Source: Research Square preprint supplement (doi:10.21203/rs.3.rs-7008982/v1), 2025-07-10
Supplement: Supplementary file 1 [file 41095629c093b08bb8445217.docx]

**Supplementary information for**

**Label-free Tracking of Single Virus Entry**

Yitao Cao1,3,8, Qingwen Ding2,3,8, Yingjie Dou1,3,8, Fei Wang1,3,Yang Zhao1, Jiaqi Gu1,3, Yifei Ye1,3, Xiaofeng Luan1,3, Jiahong Jiang1, Sai Zhang2,3, Xiaoxi Ding1,3, Runze Fang1,3, Yuan Zhang2, Jianguang Li4, Lusheng Gu5, Jin Yang1, Nan Li1, Chengjun Huang1,3, Yang Xia1,3,6,7,*, Wei Ji5,*, Zhenhua Zheng2,*, Xinchao Lu1,*

1Institute of Microelectronics, Chinese Academy of Sciences, Beijing 100029, China

2State Key Laboratory of Virology and Biosafety, Wuhan Institute of Virology, Chinese Academy of Sciences, Wuhan 430071, China

3University of Chinese Academy of Sciences, Beijing 100049, China

4State Key Laboratory of Optoelectronic Materials and Devices, Institute of Semiconductors, Chinese Academy of Sciences, Beijing 100083, China

5National Laboratory of Biomacromolecules, Institute of Biophysics, Chinese Academy of Sciences, Beijing 100101, China

6University of Science and Technology of China, Hefei 230026, China

7Suzhou Institute for Advanced Research, University of Science and Technology of China, Suzhou 215123, China

8These authors contributed equally.

*Email: xiayang@ime.ac.cn, [jiwei@ibp.ac.cn](mailto:jiwei@ibp.ac.cn), zhengzh@wh.iov.cn, luxinchao@ime.ac.cn

**Table of contents:**

**1. Supplementary Figures**

Supplementary Figure 1: Label-free single virus tracking instrument and three viruses as well as living cell adhered to the Au film substrate.

Supplementary Figure 2: The comparison of standard deviation of lateral *xy* peak localization by using three localization methods.

Supplementary Figure 3: The verification of both ECTV and PRV infecting Vero cells and PRV not entry SF9 cells.

Supplementary Figure 4: The unknown particles in Vero cell environment as well as virus-host cell environment.

**2.** **Supplementary Tables**

Supplementary Table 1: Parameters retrieved from MSD fitting to label-free BV, ECTV and PRV.

**3.** **Supplementary Notes**

Supplementary Note 1: MATLAB code of 3D trajectory reconstruction, instant velocity and MSD fitting.

**4. Description of** **Supplementary Movies**

Supplementary Movie 1: Tracking single BV entry SF9 cell.

Supplementary Movie 2: Tracking single ECTV entry Vero cell.

Supplementary Movie 3: Tracking single PRV with directional movement of Step 3.

Supplementary Movie 3: Tracking single PRV entry Vero cell with confinement movement.

**
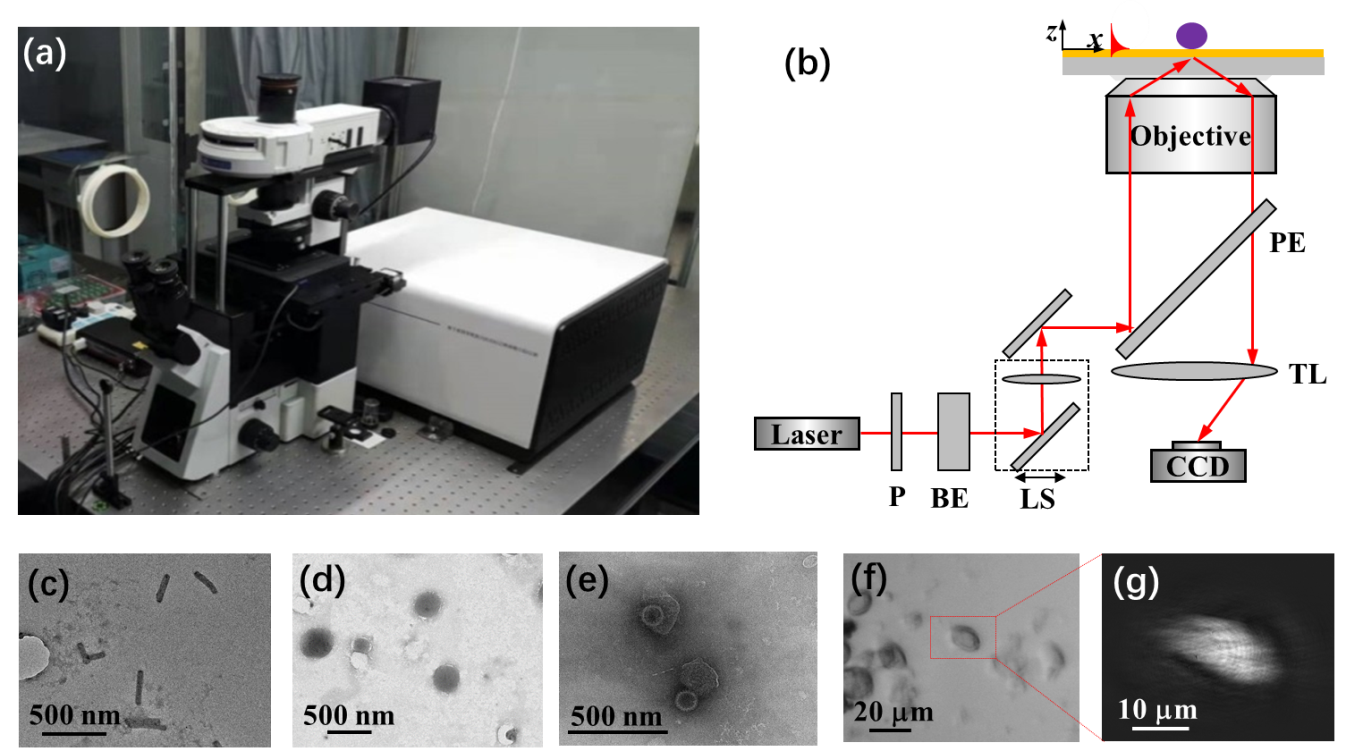
**

**Supplementary** **Figure 1**

**Label-free single virus tracking instrument and three viruses as well as living cell adhered to the Au film substrate.**

(a) Homebuilt label-free single virus tracking instrument SPVT-600. (b) The Optical path diagram of the SPVT-600, P: polarizer, BE: Beam expander, LS: linear stage, PE: Pellicle, TL: Tube lens. Electron microscopy imaging of (c) baculovirus (BV), (d) ectromelia virus (ECTV), and (e) pseudorabies virus (PRV). (f) Surface plasmon resonance microscopy (SPRM) and (f) epi-microscopy imaging of a single SF9 cell.

**
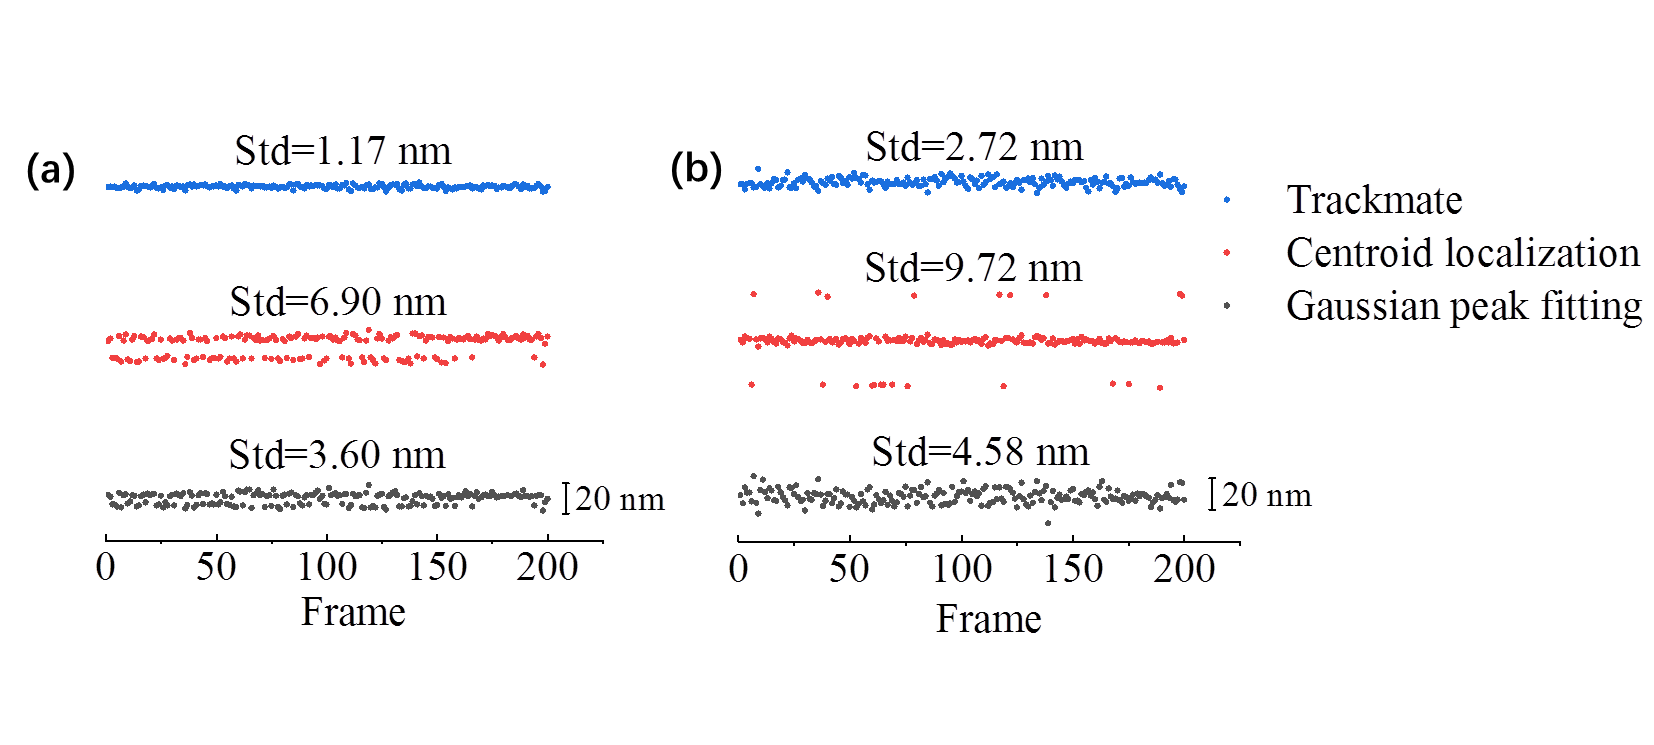
**

**Supplementary** **Figure 2**

**The comparison of** **standard deviation of xy localization by using three peak localization methods.**

The standard deviation of (a) *x* and (b) *y* peak localization by using three peak localization methods, including Trackmate, Centroid localization and Gaussian peak fitting. The standard deviation in the *xy* positions are 1.17 nm and 2.72 nm by using Trackmate, respectively. While, the Centroid localization and Gaussian peak fitting indicate worse standard deviations, which is 6.90 nm (*x*) and 9.72 nm (*y*), as well as 3.6 nm (*x*) and 4.58 nm (*y*), respectively.


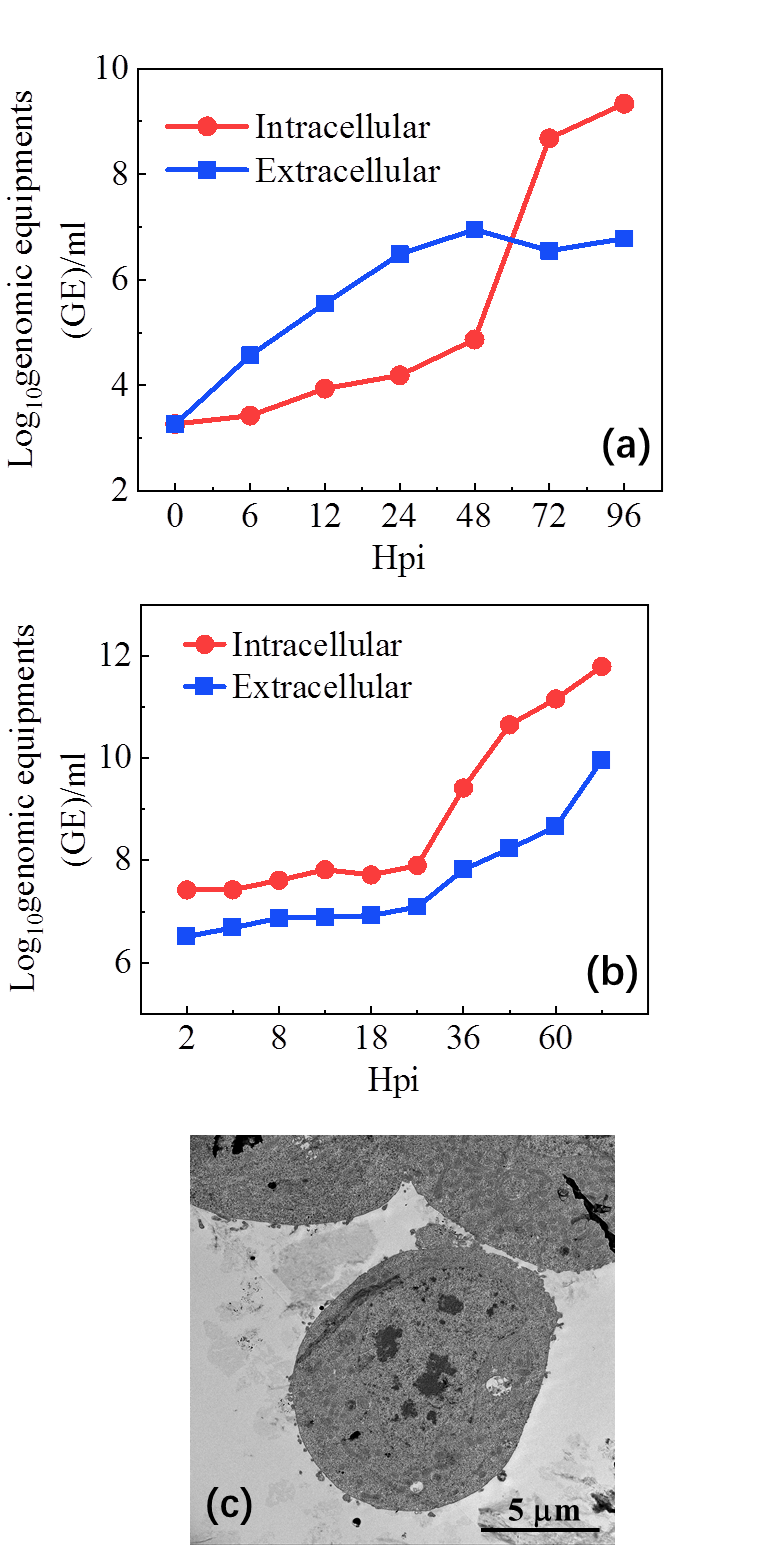


**Supplementary** **Figure 3**

**The verification of both ECTV and PRV infecting Vero cells and PRV not entry SF9 cells.**

The kinetic curves of viral RNA in (a) ECTV and (b) PRV-infected Vero cells, respectively. (c) The electron microscopy imaging of PRV without entry SF9 cells.

**
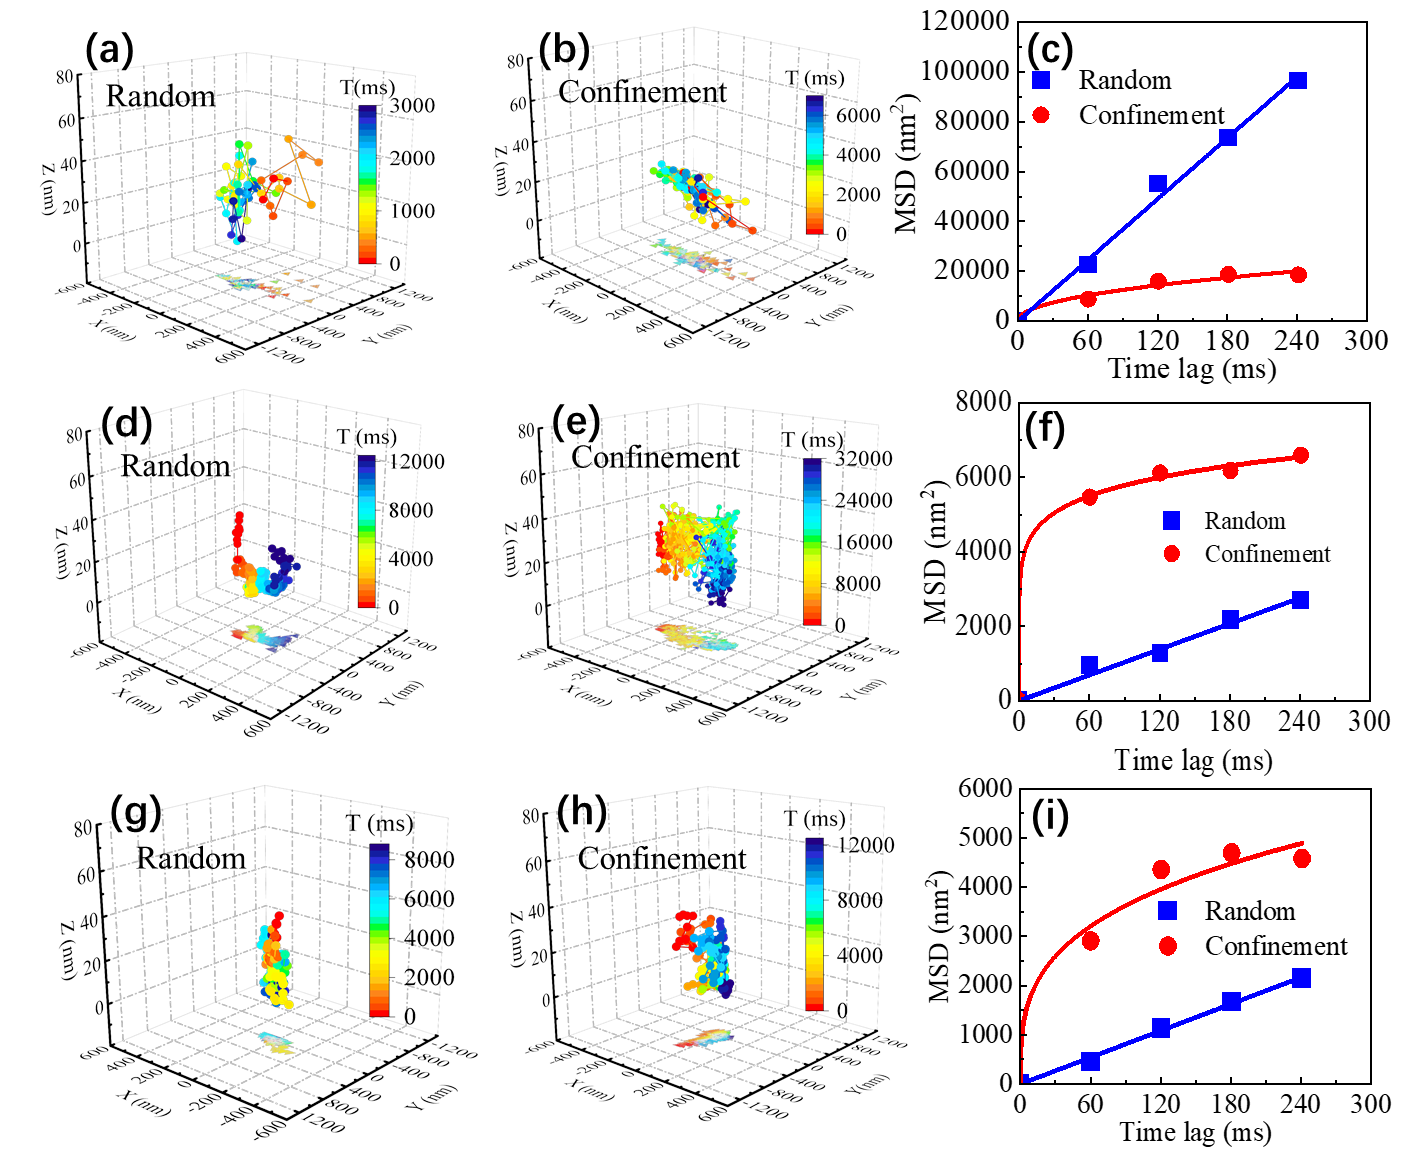
**

**Supplementary** **Figure 4**

**The unknown particles in Vero cell environment as well as virus-host cell** **environment.**

The unknown particles with (a) random and (b) confinement movement in Vero cell solution without viruses. (c) The MSD curves of (a) and (b). The unknown particles in ECTV-host cell with (d) random and (e) confinement movement. (f) The MSD curves of (d) and (e). The unknown particles in PRV-host cell with (g) random and (h) confinement movement. (i) The MSD curves of (g) and (h).

**Supplementary Table 1**

**Parameters retrieved from MSD fitting to label-free BV, ECTV and PRV.**

| **Virus** | **Motion type** | **Instantaneous velocity**  **(nm/ms)** | **Diffusion coefficient**  (**nm2/ms**) | **Fitted direct velocity**  **(nm/ms)** | | **Abnormal diffusion coefficient**  **(nm/ms)** | |
| --- | --- | --- | --- | --- | --- | --- | --- |
| **BV**  **(non-host cell)** | Random | 0-6 | 25.75 | |  | |  | |
| **Unentry**  **BV-SF9** | Random | 0-5 | 22.03 | |  | |  | |
| **ECTV**  **(non-host cell)** | Random | 0-6 | 100.37 | |  | |  | |
| **BV-SF9** | Directional | 0-7 | 34.18 | | 0.57 | |  | |
| **ECTV-Vero** | Directional | 0-2 | 3.75 | | 0.19 | |  | |
| **PRV-Vero** | Directional | 0-8 | 20.9 | | 0.19 | |  | |
| Confinement | 0-7 | 83.04 | |  | | 0.90 | |

**Supplementary Note 1**

**MATLAB code of 3D trajectory reconstruction, instant velocity and MSD fitting.**

clc

clear

DD='...\';

A = readmatrix(strcat(DD,'export.csv'));

P2L = 10000/248;

a1=2+0;

nn = 0;

x = A(a1:end-nn,5)*P2L;

y = A(a1:end-nn,6)*P2L;

z = A(a1:end-nn,17);

Im_f = A(a1:end-nn,9)+1;

N = length(x);

MSD = zeros(N,1);

r = [x,y];

for n =1:N

sumdr = 0;

for i =1:N-n

dr = norm(r(i+n,:)-r(i,:))^2;

sumdr = sumdr+dr;

end

MSD(n) = 1/(N-n)*sumdr;

end

figure(1)

nn=9;

plot(1:nn,MSD(1:nn)-MSD(1));

set(gcf,'color','white');

n1 = length(x);

t3 = (Im_f-1).*(1/16.6);

t1 = (( t3(1:n1-1)) * 1000);

Vt1 = zeros(n1-1,1);

for i = 1 : n1-1

t = 1/16.6 * 10^3;

a = [x(i) y(i)];

b = [x(i+1) y(i+1)];

Vt1(i) = norm(b - a) /(t*(Im_f(i+1)-Im_f(i)));

end

figure(2)

plot(t1,Vt1);

set(gcf,'color','white');

z1 = -100*log(z/z(1));

n1 = length(x);

yy = 1280;

y = yy - y;

xx1 = (x - x(1));

yy1 = (y - y(1));

figure(3)

plot3(xx1,yy1,z1);

colorMarker1 = linspace(0,n1,n1)*1/16.6*1000;

cla('reset')

patch([xx1;NaN],[yy1;NaN],[z1;NaN],[colorMarker1,NaN],'EdgeColor','in terp','Marker','o','MarkerFaceColor','flat','LineWidth',2)

xlabel('X (nm)')

ylabel('Y (nm)')

zlabel('Δz (nm)')

colormap(jet) ;

colorbar;

set(gca,'linewidth',1,'FontSize',18,'FontName','Times New Roman');

set(gca,'tickdir','in');

set(gcf,'color','white');

view(3)

box on

**Supplementary Movie 1:** Real-time movie of the 2D trajectory of single BV in SF9 cell context shown in Figure 3(c) of the main text. The white line indicates the outline of the cell adhesion to Au substrate. The single label-free BV moves directionally and eventually disappears in the cell. The frame rate of the movie is set as 16.6 fps.

**Supplementary Movie 2:** Real-time movie of the 2D trajectory of single ECTV in Vero cell context shown in Figure 4(g) of the main text. The white line indicates the outline of the cell adhesion to Au substrate. The single label-free ECTV moves directionally and eventually disappears in the cell. The frame rate of the movie is set as 16.6 fps.

**Supplementary Movie 3:** Real-time movie of the 2D trajectory of single ECTV in Vero cell context shown in Figure 4(j) of the main text. The white line indicates the outline of the cell adhesion to Au substrate. The single label-free ECTV moves directionally and eventually disappears in the cell. The frame rate of the movie is set as 16.6 fps.

**Supplementary Movie 4:** Real-time movie of the 2D trajectory of single PRV in Vero cell context shown in Figure 5(i) of the main text. The white line indicates the outline of the cell adhesion to Au substrate. The single label-free PRV moves directionally near the cell. The frame rate of the movie is set as 16.6 fps.

**Supplementary Movie 5:** Real-time movie of the 2D trajectory of single PRV in Vero cell context shown in Figure 5(k) of the main text. The white line indicates the outline of the cell adhesion to Au substrate. The single label-free PRV indicates confinement movement near the cell and eventually disappears in the cell. The frame rate of the movie is set as 16.6 fps.
